1 **Strategies to improve photosynthetic nitrogen-use efficiency with no yield penalty: lessons from**  
2 **late-sown winter wheat**

3

4 **Running title:** Strategies to improve photosynthetic nitrogen-use efficiency

5

6 Lijun Yin<sup>a</sup>, Haicheng Xu<sup>b</sup>, Shuxin Dong<sup>a</sup>, Jinpeng Chu<sup>a</sup>, Xinglong Dai<sup>a\*</sup>, Mingrong He<sup>a\*</sup>

7

8 <sup>a</sup> Collaborative Innovation Team of Shandong Wheat-Corn Crops; National Key Lab. of Crop Biology,  
9 Key Lab. of Crop Ecophysiology and Farming System, Ministry of Agriculture, Agronomy College of  
10 Shandong Agricultural University, Tai'an 271018, Shandong, P.R. China.

11 <sup>b</sup> Yellow River Delta Agricultural Hi-tech Industrial Demonstration Zone, Guangbei Farm Zhongxin  
12 Street 19, Dongying, Shandong, P.R. China.

13 \*Corresponding author. Tel: +86 05388244018

14 E-mail addresses: yinlijun326@163.com (Lijun Yin); xuhaich@126.com (Haicheng Xu);  
15 dongshuxin666666@163.com (Shuxin Dong); chuJP@sdau.edu.cn (Jinpeng Chu); adaisdny@163.com  
16 (Xinglong Dai), mrhe@sdau.edu.cn (Mingrong He).

17

18 **Highlight**

19

20 Optimal *N* allocation at several integration levels accounts for improved canopy *PNUE* while maintaining  
21 high grain yield in winter wheat

22

23 **Abstract**

24

25 **Improving canopy photosynthetic nitrogen-use efficiency (*PNUE*) may maintain or even increase**  
26 **yield with reduced *N* input. In this study, later-sown winter wheat was studied to reveal the**  
27 **mechanism underlying improved canopy *PNUE* while maintaining high yield. *N* allocation at**  
28 **several levels was optimised in late-sown wheat plants. *N* content per plant increased. Increased *N***  
29 **was allocated to the flag leaf and second leaf, and to ribulose-1, 5-bisphosphate**  
30 **carboxylase/oxygenase (*Rubisco*) in upper leaves. Constant or reduced *N* was allocated to leaf 3, leaf**  
31 **4, and *Rubisco* in lower leaves. The specific green leaf area nitrogen (*SLN*) of upper leaves**  
32 **increased, while that of lower leaves remained unchanged or decreased. *N* allocation to the cell wall**  
33 **decreased in all leaves. As a result, the maximum carboxylation rate of upper leaves increased, and**

34 that of lower leaves remained constant or decreased. CO<sub>2</sub> diffusion capacity was enhanced in all  
35 leaves. Outperformance by light-saturated net photosynthetic rate ( $P_{max}$ ) over *SLN* led to improved  
36 *PNUE* in upper leaves. Enhanced  $P_{max}$  coupled with unchanged or decreased *SLN* resulted in  
37 improved *PNUE* in lower leaves. High yield was maintained because enhanced photosynthetic  
38 capacity at the leaf and whole plant levels compensated for reduced canopy leaf area.

39

#### 40 **Keywords**

41

42 Leaf mass per area, Light-saturated net photosynthetic rate, *N* allocation, Photosynthetic nitrogen-use  
43 efficiency, Specific green leaf area nitrogen, Winter wheat

44

#### 45 **Abbreviations**

46

47  $C_c$ , chloroplastic CO<sub>2</sub> concentration

48  $C_i$ , intercellular CO<sub>2</sub> concentration

49 *ETR*, total electron transport rate

50  $g_m$ , mesophyll conductance

51  $g_s$ , stomatal conductance

52  $J_{max}$ , light-saturated potential rate of electron transport

53 *LMA*, leaf mass per area

54  $N_m$ , the mass of nitrogen in the leaf per total mass of leaf

55  $P_{max}$ , light-saturated net photosynthetic rate

56 *PPFD*, photosynthetic photon flux density

57 *PNUE*, photosynthetic nitrogen-use efficiency

58 *Rubisco*, ribulose-1, 5-bisphosphate carboxylase/oxygenase

59  $R_F$ , nitrogen allocated to *Rubisco*

60 *SLN*, specific green leaf area nitrogen

61  $V_{cmax}$ , maximum carboxylation rate

62

#### 63 **Introduction**

64

65 Wheat (*Triticum aestivum* L.) provides 20% of the calories and protein consumed by humans (Reynolds  
66 *et al.*, 2012). An increase in crop yield by 70% is needed if we are to meet the projected demand for food

67 by 2050 (Tilman *et al.*, 2011; Ray *et al.*, 2013). The amount of nitrogen (*N*) applied will increase with the  
68 growing demand for food production in the future (Li *et al.*, 2017). Increased economic costs and  
69 environmental concerns have heightened the desire to reduce crop *N* input while maintaining or even  
70 increasing grain yield (Cassman *et al.*, 2003; Davidson *et al.*, 2015; Zhang *et al.*, 2015). Therefore,  
71 improving *N*-use efficiency (*NUE*) has become a top priority for crop improvement. *NUE* is defined as  
72 grain yield per unit of *N* available (from soil and/or fertiliser) and can be further divided into *N*-uptake  
73 efficiency and *N*-utilisation efficiency (*UTE*) (Moll *et al.*, 1982). *UTE*, defined as grain yield per unit of *N*  
74 taken up, is an important parameter for determining the efficiency with which crop plants utilise *N* to  
75 achieve growth and grain yield (Foulkes *et al.*, 2009).

76 At the end of the 1970s, the concept of plant *N* productivity, defined as the increase in plant dry matter  
77 per unit time and per unit *N* content, was introduced to interpret the dependency of plant growth on  
78 internal *N* (Ingestad *et al.*, 1979). Following Lambers *et al.* (1990) and Garnier *et al.* (1995), plant *N*  
79 productivity was expressed as the product of *N* allocation to leaves within the plant and photosynthetic *N*  
80 use efficiency (*PNUE*). The latter was defined as the ratio between photosynthetic rate and *N*  
81 concentration in leaves. As most of the grain dry matter at maturity in wheat is contributed by  
82 photosynthates produced by leaves during the post-anthesis stage (Roberto *et al.*, 2010; Carmo-Silva  
83 *et al.*, 2017), *UTE* at the whole-plant level is dependent on *N* allocation to leaves and the *PNUE* of leaves  
84 during the post-anthesis stage.

85 Plants change *N* allocation to maximise their carbon assimilation at several integration levels. First,  
86 they allocate a given amount of *N* over a small or a large plant population through trade-offs between  
87 plant density per unit of land and *N* content in individual plants. Second, they change the fraction of *N*  
88 invested in leaves, stems and roots. Third, they modulate leaf area per unit *N* invested in leaves by  
89 altering their anatomy. Fourth, they change the relative investment of *N* among photosynthetic  
90 components. Small changes in *N* allocation can greatly affect the light-saturated photosynthetic rate ( $P_{max}$ )  
91 and *PNUE*, and therefore plant performance (Feng *et al.*, 2009).

92 Strategies to improve *PNUE* have been proposed for many species (Poorter *et al.*, 1998; Davey *et al.*,  
93 1999; Pang *et al.*, 2014; Rotundo *et al.*, 2016). Most studies have proposed that the potential benefit of  
94 increased photosynthetic capacity for *PNUE* can be realised only when it is not associated with increases  
95 in leaf mass per area (*LMA*, g m<sup>-2</sup>) or specific leaf *N* content (*N* content per unit leaf area, *SLN*), as an  
96 increase in *LMA* positively affects *SLN* and therefore reduces *PNUE* (Field and Mooney, 1986; Hirose *et al.*  
97 *et al.*, 1994; Hikosaka *et al.*, 1995; Boote *et al.*, 2003; Anand *et al.*, 2007). However, a strategy that results  
98 in lower *SLN* may limit crop yield under some conditions, particularly those designed to produce high  
99 yields. Actually, previous studies have suggested that *N* remobilisation from vegetative tissues may be

100 essential as a mobilisable *N* reservoir to sustain grain yield in cereal crops (Horton, 2000; Barbottin *et al.*,  
101 2005). The amount of *N* accumulated at anthesis largely determines the amount of *N* remobilised during  
102 grain filling (Martre *et al.*, 2003; Pask *et al.*, 2012). Taken together, these findings suggest that alternative  
103 approaches need to be explored to improve *PNUE* while maintaining high or even increasing grain yield.

104 Interspecific or intraspecific variations in *PNUE* have been explained by differences in the fraction of  
105 light absorbed by the leaf, CO<sub>2</sub> partial pressure at the intercellular space or at carboxylation sites within  
106 chloroplasts, *N* allocation to photosynthetic versus non-photosynthetic functions, *N* partitioning between  
107 light harvesting complexes, electron transport and CO<sub>2</sub> fixation, activation state or specific activity of  
108 ribulose-1, 5-bisphosphate carboxylase/oxygenase (*Rubisco*), respiration in the light, and *SLN* (Field and  
109 Mooney, 1986; Evans *et al.*, 1989; Quick *et al.*, 1991; Lambers *et al.*, 1992; Pons *et al.*, 1994; Zhu *et al.*,  
110 2007).

111 Global warming over past decades has provided an additional growing period prior to wintering that  
112 has encouraged farmers to delay the winter wheat sowing date (Xiao *et al.*, 2013, 2015). Previous studies  
113 have indirectly suggested that delayed sowing of winter wheat may have advantages in crop productivity  
114 as a function of plant *N* use (Widdowson *et al.*, 1987; Ehdaie *et al.*, 2001; Weiss *et al.*, 2003; Sun *et al.*,  
115 2007; Jalota *et al.*, 2013; Ding *et al.*, 2016; Rasmussen *et al.*, 2016). Our recent study suggested that  
116 delayed sowing improves *UTE* while maintaining a high yield by increasing spike grain weight with  
117 fewer spikes per unit area (Yin *et al.*, 2018), suggesting concurrent improvement in *PNUE* and grain  
118 productivity at the whole-plant level. The following questions have arisen from these results: (i) What  
119 causes late-sown wheat plants to have a higher *PNUE*? (□) How is coupling between improvement in  
120 *PNUE* at the whole-plant level and high grain yield at the canopy level achieved? To answer these  
121 questions, photosynthetic traits in plants, such as leaf gas exchange, chlorophyll fluorescence, *Rubisco*  
122 catalytic properties, and CO<sub>2</sub> diffusion capacity, were investigated along with *N* allocation at the canopy,  
123 whole-plant, leaf, and cellular levels. Our main goal was to test the hypothesis that optimal *N* allocation at  
124 several integration levels improves *PNUE* and grain productivity at the whole-plant level, which in turn  
125 results in improved canopy *PNUE* while maintaining high yield.

126

## 127 **Materials and methods**

128

### 129 *Plant material and growing conditions*

130 Tainong 18, a widely planted winter wheat cultivar, was grown in the field at the experimental station of  
131 Shandong Agricultural University, Taian, Shandong, China during the 2015–2016 and 2016–2017  
132 growing seasons. The preceding crop was summer maize. The soil was sandy loam with a pH of 8.0. The

133 contents of organic matter (Walkley and Black method), total *N* (semi-micro Kjeldahl method), available  
134 phosphorus (*P*; Olsen method), and available potassium (*K*; Dirks–Sheffer method) in the 0–20-cm soil  
135 layer were 12.0, 1.0, 25.1, and 47.0 mg kg<sup>-1</sup> during 2015–2016 and 12.1, 1.0, 25.3, and 47.1 mg kg<sup>-1</sup>  
136 during 2016–2017, respectively. Rainfall levels during the growing seasons of 2015–2016 and 2016–2017  
137 were 144.9 and 168.3 mm, respectively.

138 Seeds were sown at a density of 405 plants m<sup>-2</sup>, the optimal planting density of Tainong 18 for higher  
139 yield and *NUE* (Dai *et al.*, 2013), in 2015 and 2016 on 8 October (normal sowing) and 22 October (late  
140 sowing) using a 12-row planter with 0.25-m row spacing. The cumulative temperature values (sum of  
141 daily average air temperature) prior to wintering of the normal and late-sown treatments were 679.4 and  
142 444.5°C d during the 2015–2016 growing season and 682.4 and 449.5°C d during the 2016–2017  
143 growing season, respectively. The plots were arranged in a completely random design with three  
144 replicates. The size of each subplot was 20.0 × 3.0 m. Basal fertilisation of each subplot included *N* as  
145 urea, *P* as calcium superphosphate, and *K* as potassium chloride at rates of 120 kg ha<sup>-1</sup> *N*, 80 kg ha<sup>-1</sup> P<sub>2</sub>O<sub>5</sub>,  
146 and 120 kg ha<sup>-1</sup> K<sub>2</sub>O, respectively. An additional 120 kg ha<sup>-1</sup> *N* as urea was applied at the beginning of the  
147 jointing stage. Irrigation was carried out before wintering, at jointing, and at anthesis, with approximately  
148 60 mm each time. Pests and diseases were controlled chemically. No significant incidences of pests,  
149 diseases, or weeds occurred in any of the subplots.

150

#### 151 *Crop measurement*

##### 152 *Biomass and nitrogen content of individual plant and leaves*

153 Plants on 0.2 m<sup>2</sup> were taken as samples and counted in each subplot at 7-day intervals from anthesis to  
154 maturity. All individual plants were divided into flag leaf, second leaf, leaf 3, leaf 4, and the remaining  
155 parts. The planar green area of each leaf was measured (in cm<sup>2</sup>) using a green area meter (Li-Cor 3100,  
156 Li-Cor, Inc., Lincoln, NE, USA). Biomass was measured after oven drying to constant mass at 75°C. The  
157 samples were ground, and *N* mass per unit dry mass was determined using an elemental analyser (Rapid  
158 N Exceed, Elementar, Langensfeld, Germany). The *LMA* (g m<sup>-2</sup> green leaf area) and *SLN* (g *N* m<sup>-2</sup> green  
159 leaf area) values were calculated.

160

##### 161 *Grain yield, yield components, plant N productivity, and UTE*

162 Plants were harvested from a 2.0-m × 6-row (1.5 m) quadrat in each subplot as described by Dai *et al.*  
163 (2013). The grain was air-dried, weighed, and adjusted to standard 12% moisture content (88% dry matter,  
164 kg ha<sup>-1</sup>). This was considered grain dry matter yield.

165 Plant *N* productivity was defined as the increase in plant dry matter per unit time and per unit *N* content.

166 *UTE* was defined as grain yield per unit of *N* taken up (Moll *et al.*, 1982).

167

#### 168 *Biomass and nitrogen content of the cell wall*

169 Biomass and nitrogen content of the cell wall were measured according to the procedures described by  
170 Lamport (1965) and Onoda *et al.* (2004). Approximately 10 mg of freeze-dried leaves was extracted in  
171 1.5 mL of buffer (50 mM tricine, pH 8.1) containing 1% PVP40 (average molecular weight 40,000,  
172 product no. 1407; Sigma Chemical Co., St Louis, MO, USA). The sample was vortexed and centrifuged  
173 at 12,000 *g* for 5 min (AG 5424; Eppendorf, Hamburg, Germany), and the supernatant was carefully  
174 removed. The pellet was resuspended in buffer without PVP containing 1% sodium dodecyl sulphate  
175 (SDS), incubated at 90°C for 5 min and centrifuged at 12,000 *g* for 5 min. This was repeated, and then  
176 two washes with 0.2 M KOH, two washes with deionised water, and then two washes with ethanol were  
177 carried out. The tube containing the pellet was oven-dried at 80°C. The remaining dry mass of the pellet  
178 was assumed to represent the leaf cell wall biomass, and *N* content was determined on 2–5 mg of material  
179 using the elemental analyser.

180

#### 181 *Biomass and Rubisco nitrogen content*

182 The *Rubisco* content of each layer leaf at anthesis was determined according to Makino *et al.* (1985,  
183 1986). Briefly, leaves were sampled and immersed in liquid *N* and then stored at –70°C. A 0.5-g aliquot  
184 of leaves was ground in a buffer solution containing 50 mM Tris-HCl (pH 8.0), 5 mM β-mercaptoethanol,  
185 and glycerol 12.5% (v/v), and the extracts were centrifuged for 15 min at 1,500 *g* at 2°C. The supernatant  
186 was mixed with dissolving solution containing 2% (w/v) SDS, 4% (v/v) β-mercaptoethanol, and 10% (v/v)  
187 glycerol, and the mixture was boiled in water for 5 min for the protein electrophoresis assay. An  
188 electrophoretic buffer system was used with sodium dodecyl sulphate–polyacrylamide gel electrophoresis  
189 in a discontinuous buffer system with a 12.5% (w/v) separating gel and a 4% (w/v) concentrated gel. The  
190 gels were washed with deionised water several times, dyed in 0.25% Coomassie Blue staining solution  
191 for 12 h, and decolourised until the background was colourless. Large subunits and relevant small  
192 subunits were transferred to a 10-ml cuvette with 2 ml of formamide and washed in a 50°C water bath at  
193 room temperature for 8 h. The wash solution was measured at 595 nm using background glue as the blank  
194 and bovine serum albumin as the standard protein. Because the amount of *N* per unit *Rubisco* is 16%  
195 (Field and Mooney, 1986), *Rubisco N* content per unit leaf area was calculated as *Rubisco* content  
196 multiplied by 16%.

197

#### 198 *Relative amount of mRNA*

199 Total *RNA* was extracted from frozen leaf discs using Trizol according to the manufacturer's  
200 specifications. *RNA* yield was determined using a NanoDrop 2000 spectrophotometer (Thermo Scientific,  
201 Waltham, MA, USA), and integrity was evaluated by agarose gel electrophoresis and ethidium bromide  
202 staining.

203 A two-step reaction process of reverse transcription and polymerase chain reaction (PCR) was used for  
204 quantification. Each reverse transcription reaction had two steps. The first step was 0.5  $\mu\text{g}$  *RNA*, 2  $\mu\text{l}$  of 4  
205  $\times$  g *DNA* wiper Mix and 8  $\mu\text{l}$  of nuclease-free  $\text{H}_2\text{O}$ . Reactions were performed in a GeneAmp® PCR  
206 System 9700 (Applied Biosystems, Foster City, CA, USA) for 2 min at 42°C. The second step was to add  
207 2  $\mu\text{l}$  of 5 $\times$  HiScript II Q reverse transcription SuperMix IIa. Reactions were performed in a GeneAmp®  
208 PCR System 9700 for 10 min at 25°C, 30 min at 50°C, and 5 min at 85°C. The 10  $\mu\text{l}$  of reverse  
209 transcription reaction mix was diluted  $\times 10$  in nuclease-free water and held at  $-20^\circ\text{C}$ . Real-time PCR was  
210 performed using the LightCycler® 480 II Real-time PCR instrument (Roche, Basel Switzerland) with 10  
211  $\mu\text{l}$  of PCR reaction mixture that included 1  $\mu\text{l}$  of cDNA, 5  $\mu\text{l}$  of 2 $\times$  QuantiFast® SYBR® Green PCR  
212 Master Mix (Qiagen, Hilden, Germany), 0.2  $\mu\text{l}$  of forward primer, 0.2  $\mu\text{l}$  of reverse primer and 3.6  $\mu\text{l}$  of  
213 nuclease-free water. Reactions were incubated in a 384-well optical plate (Roche) at 95°C for 5 min,  
214 followed by 40 cycles of 95°C for 10 s and 60°C for 30 s. Each sample was run in triplicate for the  
215 analysis. At the end of the PCR cycle, a melting curve analysis was performed to validate specific  
216 generation of the expected PCR product. The primer sequences were designed in the laboratory and  
217 synthesised by Generay Biotech (Generay, PRC) based on the *mRNA* sequences obtained from the NCBI  
218 database as follows: AGTAGCTGCCGAATCTTCT.

219 The expression levels of *mRNAs* were normalised to GAPDH and were calculated using the  $2^{-\Delta\Delta\text{Ct}}$   
220 method (Livak and Schmittgen, 2001).

221

#### 222 *Activated and inactivated Rubisco content*

223 Initial and total *Rubisco* activities were determined according to a procedure described by Keys and Parry  
224 (1990). Initial activity was determined by adding 25  $\mu\text{l}$  of supernatant to 475 ml of a  $\text{CO}_2$ -free assay  
225 buffer containing 100 mM bicine, pH 8.2, and 20 mM  $\text{MgCl}_2$ , to which  $\text{NaH}^{14}\text{CO}_3$  ( $7.4 \text{ kBq } \mu\text{mol}^{-1}$ ) and  
226 *RuBP* had been added to concentrations of 10 and 0.4 mM, respectively, immediately prior to adding the  
227 extract. Total activity was determined by incubating 20 ml of extract for 3 min in 980 ml of the same  
228 assay buffer without *RuBP*, allowing for carbamylation of all available active sites. The assay was started  
229 by adding 0.4 mM *RuBP* as indicated above. The *Rubisco* activation state was determined from the ratio  
230 of initial to total activity. The inactive *Rubisco* content was the difference between the total amount of  
231 *Rubisco* and active *Rubisco* content.

232

233 *Leaf gas-exchange and fluorescence measurements*

234 Thirty culms with the same flowering date were tagged at anthesis. Gas-exchange measurements were  
235 conducted at intervals of 7 days from anthesis to maturity. The leaf light-saturated net photosynthetic rate  
236 ( $P_{max}$ ), stomatal conductance ( $g_s$ ), and intercellular CO<sub>2</sub> concentration ( $C_i$ ) of six tagged plants per plot  
237 were determined simultaneously. The average  $P_{max}$  values of the six plants in each plot were taken as a  
238 replicate.  $P_{max}$  was measured from 9:00 to 11:00 using a portable photosynthesis system (Li6400; LI-  
239 COR) at a light intensity of 1,200  $\mu\text{mol m}^{-2} \text{s}^{-1}$ . Leaf temperature during the measurements was  
240 maintained at  $27.0 \pm 0.1^\circ\text{C}$ . The ambient CO<sub>2</sub> concentration in the leaf chamber ( $C_{a-c}$ ) was adjusted as the  
241 atmospheric CO<sub>2</sub> concentration ( $C_a$ ) ( $410 \pm 1.5 \mu\text{mol CO}_2 \text{mol}^{-1}$ ), and relative humidity was maintained at  
242 60%. Data were recorded after equilibration to a steady state (~10 min).  $PNUE$  was calculated by  
243 dividing  $P_{max}$  by  $SLN$ .

244 Steady-state fluorescence ( $F_s$ ), dark-adapted minimum fluorescence ( $F_o$ ), dark-adapted maximum  
245 fluorescence ( $F_m$ ), and light-adapted maximum fluorescence ( $F_m'$ ) were simultaneously measured using a  
246 portable fluorescent instrument (FMS-2, Hansatech, King's Lynn, UK). Data were recorded after  
247 equilibration to a steady state. The maximum capture efficiency of excitation energy by open photosystem  
248 (PS)II reaction centres ( $F_v/F_m$ ) and actual capture efficiency of excitation energy by open PSII reaction  
249 centres ( $F_v'/F_m'$ ) were estimated according to Genty *et al.* (1989).

250

251 *Measurement of mitochondrial respiration rate in the light ( $R_d$ ) and the CO<sub>2</sub> compensation point related*  
252 *to  $C_i$  ( $\Gamma^*$ )*

253  $R_d$  and  $\Gamma^*$  were measured by the following steps, which utilised the photorespiration rate being dependent  
254 on and  $R_d$  being independent of photosynthetic photon flux density ( $PPFD$ , reviewed by Brooks and  
255 Farquhar, 1985; Bernacchi *et al.*, 2001). When the  $P_{max}/C_i$  response curves were prepared at a series of  
256 CO<sub>2</sub> concentrations and at a battery of  $PPFD$ s, they intersected at one point where  $P_{max}$  was the same at  
257 different  $PPFD$ s. Therefore,  $P_{max}$  at that point represented  $-R_d$ , and  $C_i$  represented  $\Gamma^*$ . In the present  
258 experiment,  $R_d$  and  $\Gamma^*$  were measured on different leaf layers from 0:00 h to 4:00 h (Brooks and Farquhar,  
259 1985; Guo *et al.*, 2005, 2007).  $PPFD$ s were controlled as a series of 150, 300, and 600  $\mu\text{mol photons m}^{-2}$   
260  $\text{s}^{-1}$ . At each  $PPFD$ ,  $C_{a-c}$  was adjusted as a series of 25, 50, 80 and 100  $\mu\text{mol CO}_2 \text{mol}^{-1}$ . The leaves were  
261 fixed in a leaf chamber with a  $PPFD$  of 600- $\mu\text{mol photons m}^{-2} \text{s}^{-1}$  and a  $C_{a-c}$  of 100- $\mu\text{mol CO}_2 \text{mol}^{-1}$  30  
262 min prior to initiating measurements.

263

264 *Stomatal density and stomatal aperture*



265 Epidermal peels were stripped from leaves. Stomatal density was recorded under a microscope (Olympus  
266 Corp., Tokyo, Japan) in a 0.196-mm<sup>2</sup> leaf area. A total of 1,000 stomatal apertures were measured under  
267 the microscope.

268

### 269 *Electron microscopy*

270 Approximately 1–2-mm<sup>2</sup> leaf sections were cut from the middle of each layer of leaves at anthesis using  
271 two razor blades, fixed in 2.5% glutaraldehyde (0.1 M phosphate buffer, pH 7.4), and post-fixed in 2%  
272 osmium tetroxide. Specimens were dehydrated in a graded acetone series and embedded in Epon 812. The  
273 leaf sections were cut on a Power Tome-XL ultramicrotome and stained with 2% uranyl acetate,. Then,  
274 cell wall thickness, chloroplast number, and chloroplast size were examined with an H-7650 transmission  
275 electron microscope.

276

### 277 *Calculation*

278 *Calculation of ETR:* Total electron transport rate (*ETR*) was calculated from Eq. 1:

279

$$280 \quad ETR = (Fm' - Fs)/Fm' \times PPF D \times \alpha_{leaf} \times \beta, \quad (1)$$

281

282 where  $\alpha_{leaf}$  is leaf absorbance, and  $\beta$  is the distribution of electrons between PSI and PSII.  $\alpha_{leaf}$  is  
283 dependent on chlorophyll content, and a curvilinear relationship between leaf absorption and chlorophyll  
284 content was observed by Evans (Evans *et al.*, 1996; Evans and Poorter, 2001). However, curvature was  
285 extremely low when chlorophyll content was >0.4 mmol m<sup>-2</sup>. According to Evans and Poorter (2001), the  
286  $\alpha_{leaf}$  calculation demonstrates that  $\alpha_{leaf}$  is close to 0.85 (Asner *et al.*, 1998; Manter and Kerrigan, 2004). In  
287 this study,  $\alpha_{leaf}$  was also assumed to be 0.85, and  $\beta$  was assumed to be 0.5 (Ehleringer and Pearcy, 1983;  
288 Alvertssom, 2001).

289

290 *Calculation of  $V_{cmax}$ :* The  $V_{cmax}$  was calculated as described by Wilson *et al.* (2000).

291

$$292 \quad V_{cmax} = 6.25 \times V_{cr} \times LMA \times N_m \times R_F, \quad (2)$$

293

294 where 6.25 is the ratio of the weight of *Rubisco* to the weight of *N* in *Rubisco*;  $V_{cr}$  is the specific activity  
295 of *Rubisco*, which is assumed to be only a function of temperature (20.7  $\mu\text{mol CO}_2$  (g *Rubisco*)<sup>-1</sup> s<sup>-1</sup> at  
296 25°C);  $LMA$  is leaf mass per unit area (g m<sup>-2</sup>);  $N_m$  (g g<sup>-1</sup>) is the mass of *N* in the leaf per total mass of leaf;  
297 and  $R_F$  is the apparent fraction of that *N* allocated to *Rubisco*.

298

299 *Calculation of  $C_c$  and  $g_m$* : Carbon dioxide concentration in chloroplasts ( $C_c$ ) and mesophyll conductance  
300 ( $g_m$ ) were calculated from Eqs. 6 and 7 (Harley *et al.*, 1992; Epron *et al.*, 1995; Manter and Kerrigan,  
301 2004):

302

$$303 \quad C_c = \{ \Gamma^* [ETR + 8(P_{max} + R_d)] / [ETR - 4(P_{max} + R_d)] \}, \quad (3)$$

304

$$305 \quad P_{max} = g_m \times (C_i - C_c), \quad (4)$$

306

307 where  $ETR$  and  $P_{max}$  were obtained from the gas-exchange and chlorophyll *a* fluorescence measurements  
308 conducted under saturating light;  $R_d$  and  $\Gamma^*$  were estimated as described above.

309

### 310 *Statistical analysis*

311 Our results were analysed using DPS v 7.05 software (Hangzhou RuiFeng Information Technology Co.,  
312 Ltd., Hangzhou, Zhejiang, China). Multiple comparisons were made after a preliminary F-test. Means  
313 were tested based on the least significant difference at  $P < 0.05$ .

314

## 315 **Results**

316

### 317 *N allocation at the canopy level, plant N productivity, grain yield, and UTE*

318 Over two wheat growing seasons, late-sown wheat plants accumulated less *N* per unit area than did that  
319 sown on the normal sowing date (Fig. 1). These reduced amounts of *N* were spread to a smaller plant  
320 population (Table 1) with higher *N* content in individual plants (Fig. 2). The above-ground biomass and *N*  
321 uptake (*AGN*) per unit area at anthesis were both reduced when the sowing date was delayed from 8 to 22  
322 October (Fig. 1). As a result, similar plant *N* productivity was obtained from sowing to anthesis on both  
323 sowing dates. Late-sown wheat plants also accumulated less *AGN* from anthesis to harvest, but more  
324 biomass per unit area than did those with the normal sowing date. An average 30.8% increase in plant *N*  
325 productivity was obtained from anthesis to harvest under the later sowing date over the normal sowing  
326 date for the two wheat growing seasons (Fig. 1), indicating that improved plant *N* productivity with  
327 delayed sowing mainly resulted from more efficient *N* use during the post-anthesis period.

328 A high grain yield of  $>9,000 \text{ kg ha}^{-1}$  was maintained, and *UTE* at harvest increased significantly when  
329 the sowing date was delayed (Table 1). In general, spike number per unit area decreased and spike grain  
330 weight increased as a result of increased spike grain number and unchanged grain weight (Table 1). These

331 results suggest that trade-offs between spike number per unit area and grain number per spike resulted in  
332 similar grain yields between the two sowing dates.

333

334 *N allocation at the levels of the whole-plant and leaf, LMA, SLN,  $P_{max}$ , and PNUE*

335 With increased *AGN* and biomass of individual plants (Fig. 2), later-sown wheat plant allocated higher  
336 fractions of *AGN* and biomass at anthesis to the upper leaves, including the flag leaves and second leaves.  
337 The fraction of *AGN* and biomass allocated to lower-position leaves, including leaves 3 and 4, remained  
338 constant or decreased (Fig. 3). Different responses to delayed sowing in *LMA* and *SLN* were observed  
339 with leaf position in the canopy, as the area of all positioned leaves was not affected (Fig. 4). The *LMA*  
340 and *SLN* of the upper leaves increased, and those of lower positioned leaves remained constant or  
341 decreased (Fig. 5). The  $N_m$  of all leaves remained unchanged. Therefore, changes in *SLN* were almost  
342 completely dependent on *LMA*.

343 Improvement in  $P_{max}$  and *PNUE* was attained in all leaves with delayed sowing. When the sowing date  
344 was delayed from 8 to 22 October,  $P_{max}$  at anthesis increased over two growing seasons by, on average,  
345 21.5%, 30.6%, 14.5%, and 25.4% in flag leaves, second leaves, and leaves 3 and 4, respectively (Fig. 6).  
346 Overall mean *PNUE* values at anthesis over the two growing seasons increased by 18.5%, 16.1%, 20.9%,  
347 and 31.2% in flag leaves, second leaves, leaf 3, and leaf 4, respectively (Fig. 6). The *PNUE* performance  
348 of the post-anthesis stage in different leaf layers was similar to that of anthesis (Supplemental Fig. 1).

349 Taken together, these results suggest that strategies underlying improvements in *PNUE* in flag leaves  
350 and second leaves differed from that in leaves 3 and 4. Increased  $P_{max}$  coupled with higher *LMA* and *SLN*  
351 in flag leaves and second leaves contributed to improve *PNUE*, whereas the combination of constant or  
352 reduced *SLN* and enhanced photosynthetic capability in leaves 3 and 4 resulted in improved *PNUE*.

353

354 *N allocation at the cellular level, Rubisco catalytic properties, and CO<sub>2</sub> diffusion capacity*

355 Optimising the functionality of *Rubisco* has large implications for improved plant productivity and  
356 resource use efficiency. Position-specific changes in transcript levels of the *mRNAs* coding *Rubisco* (Fig.  
357 7) and the amount of *Rubisco* expressed as biomass and *N* content on a unit leaf area basis (Fig. 8) were  
358 observed with delayed sowing. As the allocation proportion of biomass and *N* to the cell wall decreased,  
359 the biomass and *N* content in the cell wall on a unit leaf area basis decreased for all positioned leaves (Fig.  
360 8). The proportion of biomass and *N* allocated to total *Rubisco* and activated *Rubisco* in the flag and  
361 second leaves increased, while those in leaves 3 and 4 remained unchanged or decreased after the sowing  
362 date was delayed (Fig. 9). The  $V_{cmax}$  of the upper leaves increased, and that in the lower leaves remained  
363 constant or decreased (Fig. 10).

364 Diffusional conductance of CO<sub>2</sub> is the diffusive physiological determinant for the CO<sub>2</sub> concentration at  
365 the *Rubisco* carboxylation site that directly affects net photosynthetic rate by limiting the amount of  
366 substrate (CO<sub>2</sub>) for fixation. The  $g_s$ ,  $g_m$ , and associated traits, such as the number of stomata per unit area,  
367 stomatal aperture, cell wall thickness, chloroplast number, intercellular CO<sub>2</sub> concentration, and  
368 chloroplast CO<sub>2</sub> concentration, were measured or estimated. Higher  $g_s$  values were obtained in leaves at  
369 all positions with later sowing compared with normal sowing, resulting in higher intercellular CO<sub>2</sub>  
370 concentration ( $C_i$ ) (Fig. 11), which was associated with increased stomatal number per unit area (Fig. 12)  
371 and unchanged stomatal aperture. The  $g_m$  values in all leaves at all positions were also enhanced by  
372 delayed sowing; consequently, higher chloroplast CO<sub>2</sub> concentration ( $C_c$ ) was obtained (Fig. 11). The  
373 main reasons for this boosted  $g_m$  include decreased cell wall thickness (Figs. 13, 14), increased  
374 chloroplast number per unit leaf area (Fig. 13), and unchanged chloroplast size in response to delayed  
375 sowing.

376

## 377 Discussion

378

379 Manipulating *PNUE* at the leaf or whole-plant level will only be beneficial if it confers an improvement  
380 at the crop canopy level. As shown by Townsend *et al.* (2017), there is an opportunity to improve *PNUE*  
381 in the wheat canopy with no detriment to carbon gain or grain protein content by reducing the level of  
382 canopy *N*. In the present study, reduced canopy *AGN* at anthesis and at harvest were observed in response  
383 to delayed sowing. Later-sown wheat plants produced more biomass and grain yield on a unit area basis  
384 from anthesis to harvest with less *N* consumption than did those sown at a normal date, resulting in  
385 improved *PNUE* at the whole-plant level and *UTE* taking a reduced number of plants per unit area into  
386 consideration. As reduced total crop leaf area resulting from fewer plants per unit area was compensated  
387 for by enhanced photosynthetic capacity at the leaf and whole-plant levels, an improvement in *PNUE* at  
388 the crop canopy level was obtained while high grain yield was maintained.

389 It has long been recognised that the upper leaves serve as a major contributor to photoassimilates in the  
390 wheat grain (Waters *et al.*, 1980; Simpson *et al.*, 1983; Lopes *et al.*, 2006), while lower leaves contribute  
391 relatively little to grain yield during the grain-filling stage. Individual leaves require progressively less *N*  
392 from the top to the bottom of a canopy to maximise carbon assimilation (Gastal and Lemaire, 2002). Thus,  
393 an optimal correlation between the distribution of photosynthetic capacity, light, and *SLN* in flag leaves  
394 and second leaves is the main target for gains in yield potential, whereas leaves 3 and 4 are the main  
395 targets for gains in *PNUE* (Townsend *et al.*, 2018). In the present study, *AGN* at anthesis increased in  
396 individual plants due to a reduced number of plants per unit area. Leaf position-specific changes in *N*

397 allocation were observed.  $N$  allocation to the upper leaves, such as the flag leaf and second leaf, increased,  
398 while  $N$  allocation to lower leaves, such as leaves 3 and 4, remained unchanged or decreased.

399 Canopy-level  $PNUE$  is a complex trait involving many plant characteristics and processes from leaf  
400 anatomy and composition to leaf physiology. Earlier studies concluded that increasing  $PNUE$  without  
401 considering grain yield required de-coupling of photosynthetic capacity and  $SLN$ . Strategies to improve  
402  $PNUE$  while maintaining or increasing yield are lacking. This could potentially be achieved when  $P_{max}$  is  
403 improved more than  $SLN$ .

404 Leaf conductance of  $CO_2$  and *Rubisco* kinetic parameters play key roles in carbon assimilation that are  
405 necessary for a proper understanding of photosynthetic performance under field conditions. High  
406 photosynthetic efficiency intrinsically demands tight coordination between traits related to  $CO_2$  diffusion  
407 capacity and leaf biochemistry.  $V_{cmax}$  is the measure of the process by which *Rubisco* catalyses ribulose-  
408 1,5-bisphosphate (*RuBP*) with  $CO_2$  to produce the carbon compounds that eventually become triose  
409 phosphates (e.g. glyceraldehyde-3P), the building block for sugars and starches. According to Wilson *et*  
410 *al.* (2000), variations in  $V_{cmax}$  can be explained by changes in  $LMA$ ,  $N_m$ , and the  $N$  allocated proportion to  
411 *Rubisco* ( $R_F$ ). In the present study,  $N_m$  remained unchanged in all leaves. The  $LMA$  and  $R_F$  values in the  
412 flag and second leaves increased in response to delayed sowing, resulting in improved  $V_{cmax}$ . However,  
413  $LMA$  decreased in leaves 3 and 4, while  $R_F$  remained unchanged in leaves 3 and 4, leading to unchanged  
414  $V_{cmax}$  in leaf 3 and a decrease in  $V_{cmax}$  in leaf 4. The parallel increase between  $LMA$  and  $R_F$  disagrees with  
415 a previous observation in which smaller  $N$  partitioning into *Rubisco* was observed against larger  $N$   
416 partitioning into cell walls with increasing  $LMA$  (Poorter and Evans, 1998; Onoda *et al.*, 2004; Takashima  
417 *et al.*, 2004; Wright *et al.*, 2005; Harrison *et al.*, 2009; Hidaka *et al.*, 2009). The main reason for this  
418 difference may be related to whether interspecific (previous study) or intraspecific comparisons were  
419 made (present study).

420 As  $V_{cmax}$  represents the maximum carboxylation rate under both light-saturated and  $CO_2$ -saturated  
421 conditions,  $P_{max}$  was measured under light saturation but at a normal ambient  $CO_2$  concentration;  
422 therefore, the difference between the two parameters reflected a limitation on photosynthetic capacity  
423 exerted by the  $CO_2$  supply.

424 The  $g_m$  value, a limiting factor for  $CO_2$  diffusion to carboxylation sites in the stroma, is usually tightly  
425 coregulated with  $g_s$  (Flexas *et al.*, 2013). The  $g_m$  value depends on the surface area of mesophyll cells  
426 exposed to the intercellular air space and the thickness of the mesophyll cell walls (Evans *et al.*, 1994,  
427 2009; Tholen and Zhu, 2011; Tosens *et al.*, 2012). The finding that  $g_m$  is constrained by large  $LMA$  has  
428 been reviewed previously (Flexas *et al.*, 2008), and the underlying reason is mostly related to the thicker  
429 cell walls observed in species with high  $LMA$ , which significantly limits  $CO_2$  diffusion inside leaves

130 (Parkhurst, 1994; Hanba *et al.*, 1999; Wright *et al.*, 2005; Hidaka *et al.*, 2009; Peguero-Pina *et al.*, 2012;  
131 Tosens *et al.*, 2012; Tomás *et al.*, 2013). In contrast to previous reports, thinner cell walls in leaves at all  
132 positions were observed with larger *LMA* due to reduced biomass allocation to the cell wall under the  
133 delayed sowing condition. Moreover, an increase in the number of chloroplasts per unit leaf area allowed  
134 for a larger surface area of mesophyll cells exposed to intercellular air space. Higher  $g_s$  values were  
135 obtained in leaves at all positions on plants sowed later due to an increased number of stomata per unit  
136 area and an unchanged stomatal aperture, which is also helpful for increasing chloroplastic  $CO_2$   
137 concentration ( $C_c$ ). Combining these observations, we propose that the dominant mechanism for  
138 improved  $P_{max}$  in lower leaves in the canopy is enhanced  $CO_2$  diffusion capacity, and that in the upper  
139 leaves is dependent on the combination of *Rubisco* catalytic properties and  $CO_2$  diffusion capacity.

140

## 141 **Conclusion**

142

143 Optimal  $N$  allocation was achieved at several integration levels in response to delayed sowing. A limited  
144 amount of  $N$  was spread over a reduced plant population at the crop-canopy level, which in turn resulted  
145 in increased  $N$  content in individual plants. An increased fraction of  $N$  was allocated to upper leaves,  
146 including the flag and second leaves, which are main contributors of photoassimilates to grain filling. A  
147 decreased fraction of  $N$  was allocated to lower leaves, including leaves 3 and 4, which contribute  
148 relatively little to grain yield during grain filling. At the leaf level,  $N_m$  was constant between the two  
149 sowing dates. The *LMA* of upper leaves increased as a result of investing more biomass in a given area.  
150 As  $N_m$  remained constant, the *SLN* of these leaves increased, whereas *LMA* and *SLN* of the lower leaves  
151 remained unchanged or decreased. At the cellular level, larger proportions of  $N$  were allocated to *Rubisco*  
152 (both total and activated), which alone or along with increased *LMA* increased  $V_{cmax}$  in the upper leaves,  
153 while it remained unchanged or decreased in the lower leaves. Higher  $g_s$  values were obtained in leaves at  
154 all positions with later sowing due to the increased number of stomata per unit area and unchanged  
155 stomatal aperture, which is helpful for increasing  $C_i$ . Thinner cell walls and an increased number of  
156 chloroplasts per unit leaf area allowed for increases in  $g_m$  and  $C_c$ . Tight coordination between *Rubisco*  
157 catalytic properties and  $CO_2$  diffusion capacity led to improved  $P_{max}$  in the upper leaves, whereas  
158 improvement in  $P_{max}$  in lower leaves is dependent on enhanced  $CO_2$  diffusion capacity. Outperformance  
159 by  $P_{max}$  over *SLN* led to improved *PNUE* in upper leaves. Enhanced  $P_{max}$  coupled with unchanged or  
160 decreased *SLN* resulted in improved *PNUE* in lower leaves. In summary, optimal  $N$  allocation accounted  
161 for the improvement in *PNUE* at the crop-canopy level while maintaining a high grain yield.

162

163 **Acknowledge**

164 This work was supported by the Chinese National Basic Research Program (2015CB150404) and Funds  
165 of Shandong "Double Top" Program (SYL2017YSTD05).

## References

- Alvertssom PA.** 2001. A quantitative model of the domain structure of the photosynthetic membrane. *Trends in Plant Science* **6**, 349–354.
- Anand A, Suresh K, Nair TVR.** 2007. Photosynthetic variation and photosynthetic nitrogen use efficiency in Brassica species with different genetic constitution of ribulose-1,5-bisphosphate carboxylase. *Photosynthetica* **45**, 147–152.
- Asner GP, Wessman CA, Archer S.** 1998. Scale dependence of absorption of photosynthetically active radiation in terrestrial ecosystems. *Ecological Applications* **8**, 1003–1021.
- Barbottin A, Lecomte C, Bouchard C, Jeuffroy M-H.** 2005. Nitrogen remobilization during grain filling in wheat. *Crop Science* **45**, 1141–1150.
- Bernacchi CJ, Singaas EL, Pimentel C, Portis Jr AR, Long SP.** 2001. Improved temperature response functions for models of Rubisco-limited photosynthesis. *Plant, Cell and Environment* **24**, 253–259.
- Boote KJ, Jones JW, Batchelor WD, Nafziger ED, Myers O.** 2003. Genetic coefficients in the CROPGRO-Soybean model: links to field performance and genomics. *Agronomy Journal* **95**, 32–51.
- Brooks A, Farquhar GD.** 1985. Effect of temperature on the CO<sub>2</sub>/O<sub>2</sub> specificity of ribulose-1, 5-bisphosphate carboxylase/oxygenase and the rate of respiration in the light. *Planta* **165**, 397–406.
- Carmo-Silva E, Andralojc PJ, Scales JC, Driever SM, Mead A, Lawson T, Raines CA & Parry MAJ.** 2017. Phenotyping of field-grown wheat in the UK highlights contribution of light response of photosynthesis and flag leaf longevity to grain yield. *Journal of Experimental Botany* **68**, 3473–3486.
- Cassman KG, Dobermann A, Walters DT, Yang HS.** 2003. Meeting cerealdemand while protecting natural resources and improving environmentalquality. *Annual Review of Environment and Resources* **28**, 315–358.
- Dai XL, Zhou XH, Jia DY, Xiao LL, Kong HB, He MR.** 2013. Managing the seeding rate to improve nitrogen-use efficiency of winter wheat. *Field Crops Research* **154**, 100–109.
- Davey PA, Parsons AJ, Atkinson L, Wadge K, Long SP.** 1999. Does photosynthetic acclimation to elevated CO<sub>2</sub> increase photosynthetic nitrogen-use efficiency? A study of three native UK grassland species in open-top chambers. *Functional Ecology* **13**, 21–28.
- Davidson EA, Suddick EC, Rice CW, Prokopy LS.** 2015. More food, low pollution (Mo Fo Lo Po): a grand challenge for the 21st century. *Journal of Environment Quality* **44**, 305–311.
- Ding DY, Feng H, Zhao YJ, He Q, Zou YF, Jin JM.** 2016. Modifying Winter Wheat Sowing Date as an Adaptation to Climate Change on the Loess Plateau. *Agronomy Journal* **108**, 53–63.



- Ehdaie B & Waines JG.** 2001. Sowing date and nitrogen rate effects on dry matter and nitrogen partitioning in bread and durum wheat. *Field Crops Research* **73**, 47–61.
- Ehleringer J, Pearcy RW.** 1983. Variation in quantum yield for CO<sub>2</sub> uptake among C<sub>3</sub> and C<sub>4</sub> plants. *Plant Physiology* **73**, 555–559.
- Epron D, Godard D, Cornic G, Genty B.** 1995. Limitation of net CO<sub>2</sub> assimilation rate by internal resistances to CO<sub>2</sub> transfer in the leaves of two tree species (*Fagus sylvatica* L. and *Castanea sativa* Mill). *Plant, Cell, and Environment* **18**, 43–51.
- Evans JR.** 1989. Photosynthesis and nitrogen relationships in leaves of C<sub>3</sub> plants. *Oecologia* **78**, 9–19.
- Evans JR.** 1996. Photosynthesis and the environment. Dordrecht: Kluwer Academic Publishers.
- Evans JR, Kaldenhoff R, Genty B, Terashima I.** 2009. Resistances along the CO<sub>2</sub> diffusion pathway inside leaves. *Journal of Experimental Botany* **60**, 2235–2248.
- Evans JR, von Caemmerer S, Setchell BA, Hudson GS.** 1994. The relationship between CO<sub>2</sub> transfer conductance and leaf anatomy in transgenic tobacco with a reduced content of Rubisco. *Australian Journal of Plant Physiology* **21**, 475–495.
- Evans JR, Poorter H.** 2001. Photosynthetic acclimation of plants to growth irradiance: the relative importance of specific leaf area and nitrogen partitioning in maximizing carbon gain. *Plant, Cell, and Environment* **24**, 755–767.
- Feng YL, Lei TB, Wang RF, Callaway RM, Valientebanuet A, Inderjit, Li YP, Zheng YL.** 2009. Evolutionary tradeoffs for nitrogen allocation to photosynthesis versus cell walls in an invasive plant. *Proceedings of the National Academy of Sciences of the United States of America* **106**, 1853–1856.
- Field C & Mooney HA.** 1986. The photosynthesis-nitrogen relationship in wild plants. *On the Economy of Form and Function* (ed. TJ Givnish) pp, 25–55. Cambridge University Press, Cambridge, UK.
- Flexas J, Diaz-Espejo A, Galmés J, Medrano H.** 2008. Mesophyll conductance to CO<sub>2</sub>: current knowledge and future prospects. *Plant, Cell and Environment* **31**, 602–621.
- Flexas J, Niinemets U, Gallé A, et al.** 2013. Diffusional conductances to CO<sub>2</sub> as a target for increasing photosynthesis and photosynthetic water-use efficiency. *Photosynthesis Research* **117**, 45–59.
- Foulkes MJ, Hawkesford MJ, Barraclough PB, Holdsworth MJ, Kerr S, Kightley S, Shewry PR.** 2009. Identifying traits to improve the nitrogen economy of wheat: Recent advances and future prospects. *Field Crops Research* **114**, 329–342.
- Garnier E, Gobin O, Poorter H.** 1995. Nitrogen productivity depends on photosynthetic nitrogen use efficiency and on nitrogen allocation within the plant. *Annals of Botany* **76**, 667–672.
- Gastal F & Lemaire G.** 2002. N uptake and distribution in crops: an agronomical and ecophysiological perspective. *Journal of Experimental Botany* **53**, 789–799.

- Genty B, Briantais JM, Baker NR.** 1989. The relationship between the quantum yield of photosynthetic electron transport and quenching of chlorophyll fluorescence. *BBA-General Subjects* **990**, 87–92.
- Guo SW, Schinner K, Sattelmacher B, Hansen UP.** 2005. Different apparent CO<sub>2</sub> compensation points in nitrate- and ammonium-grown *Phaseolus vulgaris* and the relationship to non-photorespiratory CO<sub>2</sub> evolution. *Physiologia Plantarum* **123**, 288–301.
- Guo SW, Zhou Y, Shen QR, Zhang F.** 2007. Effect of ammonium and nitrate nutrition on some physiological processes of higher plants. *Plant Biology* **9**, 21–29.
- Hanba YT, Miyazawa SI, Terashima I.** 1999. The influence of leaf thickness on the CO<sub>2</sub> transfer conductance and leaf stable carbon isotope ratio for some evergreen tree species in Japanese warm temperate forests. *Functional Ecology* **13**, 632–639.
- Harley PC, Loreto F, Mareo GD, Sharkey TD.** 1992. Theoretical considerations when estimating the mesophyll conductance to CO<sub>2</sub> flux by analysis of the response of photosynthesis to CO<sub>2</sub>. *Plant Physiology* **98**, 1429–1436.
- Harrison MT, Edwards EJ, Farquhar GD, Nicotra AB, Evans JR.** 2009. Nitrogen in cell walls of sclerophyllous leaves accounts for little of the variation in photosynthetic nitrogen-use efficiency. *Plant, Cell, and Environment* **32**, 259–270.
- Hidaka A & Kitayama K.** 2009. Divergent patterns of photosynthetic phosphorus-use efficiency versus nitrogen-use efficiency of tree leaves along nutrient-availability gradients. *Journal of Ecology* **97**, 984–991.
- Hikosaka K & Terashima I.** 1995. A model of the acclimation of photosynthesis in the leaves of C3 plants to sun and shade with respect to nitrogen use. *Plant, Cell and Environment* **18**, 605–618.
- Hirose T & Werger MJA.** 1994. Photosynthetic capacity and nitrogen partitioning among species in the canopy of a herbaceous plant community. *Oecologia* **100**, 203–212.
- Horton P.** 2000. Prospects for crop improvement through the genetic manipulation of photosynthesis: morphological and biochemical aspects of light capture. *Journal of Experimental Botany* **51**, 475–485.
- Ingestad T.** 1979. Nitrogen stress in birch seedlings. II. N, K, P, Ca, and Mg nutrition. *Physiology Plant* **45**, 149–157.
- Jalota SK, Kaur H, Kaur S, Vashisht BB.** 2013. Impact of climate change scenarios on yield, water and nitrogen-balance and-use efficiency of rice-wheat cropping system. *Agricultural Water Management* **116**, 29–38.
- Keys AJ, Parry MAJ.** 1990. Ribulose bisphosphate carboxylase/oxygenase and carbonic anhydrase. *Methods in Plant Biochemistry* **3**, 1–14.

- Lambers H, Freijssen N, Poorter H, Hirose T, vander Werf A.** 1990. Analyses of growth based on net assimilation rate and nitrogen productivity. Their physiological background. In: Lambers H, Cambridge ML, Konings H, Pons TL, eds. Causes and consequences of variation in growth rate and productivity of higher plants. *The Hague: SPB Academic Publishing by* 1–17.
- Lambers H & Poorter H.** 1992. Inherent variation in growth rate between higher plants: a search for physiological causes and ecological consequences. *Advances in Ecological Research* **23**, 187–261.
- Lamport D.** 1965. The protein component of primary cell walls. *Advances in Botanical Research* **2**, 151–218.
- Li H, Hu B, Chu CC.** 2017. Nitrogen use efficiency in crops: Lessons from Arabidopsis and rice. *Journal of Experimental Botany* **68**, 2477–2488.
- Livak KJ and Schmittgen TD.** 2001. Analysis of relative gene expression data using real-time quantitative PCR and the 2<sup>-</sup>(-Delta Delta C(T)) Method. *Methods* **25(4)**, 402–408.
- Lopes MS, Cortadellas N, Kichey T, Dubois F, Habash DZ, Araus JL.** 2006. Wheat nitrogen metabolism during grain filling: comparative role of glumes and the flag leaf. *Planta* **225**, 165–181.
- Makino A, Mae T, Chira K.** 1985. Photosynthesis and rubulose-1, 5-bisphosphate carboxylase/oxygenase in rice leaves from emergence through senescence. *Planta* **166**, 414–420.
- Makino A, Mae T, Chira K.** 1986. Colorimetric measurement of protein stained with Coomassie Brilliant Blue R on sodium dodecyl sulfate-polyacrylamide gel electrophoresis by eluting with formamide. *Agricultural and Biological Chemistry* **50**, 1911–1912.
- Manter DK, Kerrigan J.** 2004. A/C<sub>i</sub> curve analysis across a range of woody plant species: influence of regression analysis parameters and mesophyll conductance. *Journal of Experimental Botany* **55**, 2581–2588.
- Martre P, Porter JR, Jamieson PD, Triboï E.** 2003. Modeling grain nitrogen accumulation and protein composition to understand the sink/source regulations of nitrogen remobilization for wheat. *Plant Physiology* **133**, 1959–1967.
- Moll RH, Kamprath EJ, Jackson WA.** 1982. Analysis and interpretation of factors which contribute to efficiency of nitrogen utilization. *Agronomy Journal* **74**, 562–564.
- Onoda Y, Hikasaka K, Hirose T.** 2004. Allocation of nitrogen to cell walls decreases photosynthetic nitrogen-use efficiency. *Functional Ecology* **18**, 419–425.
- Pang J, Palta JA, Rebetzke GJ, Milroy SP.** 2014. Wheat genotypes with high early vigour accumulate more nitrogen and have higher photosynthetic nitrogen use efficiency during early growth. *Functional Plant Biology* **41**, 215–222.
- Parkhurst DF.** 1994. Diffusion of CO<sub>2</sub> and other gases inside leaves. *New Phytologist* **126**, 449–479.

- Pask AJD, Sylvester-Bradley R, Jamieson PD, Foulkes MJ.** 2012. Quantifying how winter wheat crops accumulate and use nitrogen reserves during growth. *Field Crops Research* **126**, 104–118.
- Peguero-Pina JJ, Flexas J, Galmés J, Sancho-Knapik D, Barredo G, Villarroya D, Gil-Pelegrín E.** 2012. Leaf anatomical properties in relation to differences in mesophyll conductance to CO<sub>2</sub> and photosynthesis in two related Mediterranean *Abies* species. *Plant, Cell, and Environment* **35**, 2121–2129.
- Pons T, van der Werf A, Lambers H.** 1994. Photosynthetic nitrogen use efficiency of inherently slow- and fast-growing species: possible explanations for observed differences. In *A Whole Plant Perspective on Carbon–Nitrogen Interactions* (eds J. Roy & E. Garnier) pp, 61–77. Academic Publishing, The Hague, the Netherlands.
- Poorter H & Evans JR.** 1998. Photosynthetic nitrogen-use efficiency of species that differ inherently in specific leaf area. *Oecologia* **116**, 26–37.
- Quick WP, Schurr U, Fichtner K, Schulze ED, Rodermel SR, Bogorad L, Stitt M.** 1991. The impact of decreased rubisco on photosynthesis, growth, allocation and storage in tobacco plants which have been transformed with antisense *rbcS*. *Plant Journal* **1**, 51–58.
- Rasmussen IS & Thorup-Kristensen K.** 2016. Does earlier sowing of winter wheat improve root growth and N uptake? *Field Crops Research* **196**, 10–21.
- Ray DK, Mueller ND, West PC, Foley JA.** 2013. Yield trends are insufficient to double global crop production by 2050. *Plos One* **8**, e66428.
- Reynolds M, Foulkes J, Furbank R, Griffiths S, King J, Murchie E, Parry M, Slafer G.** 2012. Achieving yield gains in wheat. *Plant, Cell, and Environment* **35(10)**, 1799–1823.
- Roberto Ferrise, Andrea Triossi, Pierre Stratonovitch, Marco Bindi, Pierre Martre.** 2010. Sowing date and nitrogen fertilization effects on dry matter and nitrogen dynamics for durum wheat: An experimental and simulation study. *Field Crops Research* **117**, 245–257.
- Rotundo JL & Borrás L.** 2016. Reduced soybean photosynthetic nitrogen use efficiency associated with evolutionary genetic bottlenecks. *Functional Plant Biology* **43**, 462–469.
- Simpson RJ, Lambers H, Dalling MJ.** 1983. Nitrogen redistribution during grain growth in wheat (*Triticum aestivum* L.): IV. development of a quantitative model of the translocation of nitrogen to the grain. *Plant Physiology* **71**, 7–14.
- Sun H, Zhang X, Chen S, Pei D, Liu C.** 2007. Effects of harvest and sowing time on the performance of the rotation of winter wheat-summer maize in the North China Plain. *Industrial Crops and Products* **25**, 239–247.
- Takashima T, Hikosaka K, Hirose T.** 2004. Photosynthesis or persistence: nitrogen allocation in leaves of evergreen and deciduous *Quercus* species. *Plant, Cell, and Environment* **27**, 1047–1054.

- Tholen D & Zhu XG.** 2011. The mechanistic basis of internal conductance: a theoretical analysis of mesophyll cell photosynthesis and CO<sub>2</sub> diffusion. *Plant Physiology* **156**, 90–105.
- Tilman D, Balzer C, Hill J, Befort BL.** 2011. Global food demand and the sustainable intensification of agriculture. *Proceedings of the National Academy of Sciences of the United States of America* **108**, 20260–20264.
- Tomás M, Flexas J, Copolovici L, et al.** 2013. Importance of leaf anatomy in determining mesophyll diffusion conductance to CO<sub>2</sub> across species: quantitative limitations and scaling up by models. *Journal of Experimental Botany* **64**, 2269–2281.
- Tosens T, Niinemets Ü, Westoby M, Wright IJ.** 2012. Anatomical basis of variation in mesophyll resistance in eastern Australian sclerophylls: news of a long and winding path. *Journal of Experimental Botany* **63**, 5105–5119.
- Townsend AJ, Retkute R, Chinnathambi K, Randall JW, Foulkes J, Carmo-Silva E, Murchie EH.** 2017. Suboptimal acclimation of photosynthesis to light in wheat canopies. *Plant Physiology* **176**, pp.01213.
- Waters SP, Peoples MB, Simpson RJ, Dalling MJ.** 1980. Nitrogen redistribution during grain growth in wheat (*Triticum aestivum* L.): I. Peptide hydrolase activity and protein breakdown in the flag leaf, glumes and stem. *Planta* **148**, 422–428.
- Weiss A, Hays CJ, Won J.** 2003. Assessing winter wheat responses to climate change scenarios: A simulation study in the U.S. Great Plains. *Climatic Change* **58**, 119–148.
- Widdowson FV, Penny A, Darby R J, Bird E, Hewitt MV.** 1987. Amounts of NO<sub>3</sub>-N and NH<sub>4</sub>-N in soil, from autumn to spring, under winter wheat and their relationship to soil type, sowing date, previous crop and N uptake at Rothamsted, Woburn and Saxmundham, 1979–85. *Journal of Agricultural Science* **108**, 73–95.
- Wilson KB, Baldocchi DD & Hanson PJ.** 2000. Quantifying stomatal and non-stomatal limitations to carbon assimilation resulting from leaf aging and drought in mature deciduous tree species. *Tree Physiology* **20**, 787–797.
- Wright IJ, Reich PB, Cornelissen JHC, et al.** 2005. Assessing the generality of global leaf trait relationships. *New Phytologist* **166**, 485–496.
- Xiao D, Moiwo JP, Tao F, Yang Y, Shen Y, Xu Q, Liu J, Zhang H, Liu F.** 2015. Spatiotemporal variability of winter wheat phenology in response to weather and climate variability in China. *Mitigation and Adaptation Strategies for Global Change* **20**, 1191–1202.

**Xiao D, Tao F, Liu Y, Shi W, Wang M, Liu F, Zhang S, Zhu Z.** 2013. Observed changes in winter wheat phenology in the North China Plain for 1981–2009. *International Journal of Biometeorology* **57**, 275–285.

**Yin LJ, Dai XL, He MR.** 2018. Delayed sowing improves nitrogen utilization efficiency in winter wheat without impacting yield. *Field Crops Research* **221**, 90–97.

**Zhang X, Davidson EA, mauserall DL, searchinger TD, Dumas P, Shen Y.** 2015. Managing nitrogen for sustainable development. *Nature* **528**, 51–59.

**Zhu XG, de Sturler E, Long SP.** 2007. Optimizing the distribution of resources between enzymes of carbon metabolism can dramatically increase photosynthetic rate: a numerical simulation using an evolutionary algorithm. *Plant Physiology* **145**, 513–526.

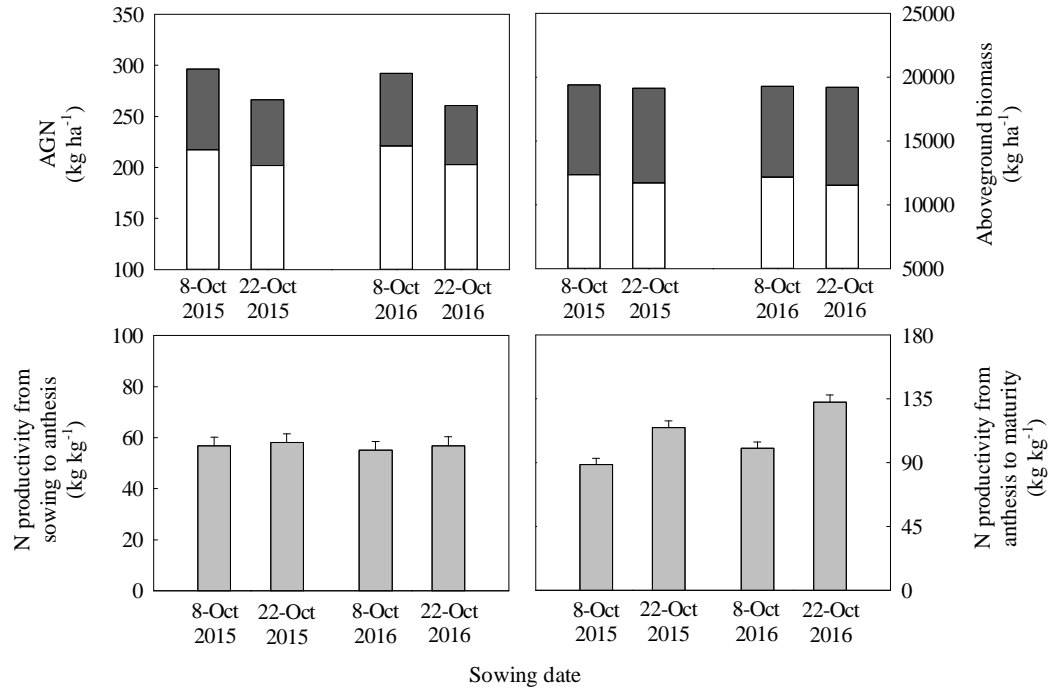

**Fig. 1.** Aboveground N uptake (AGN) at anthesis (blank column) and maturity (blank column plus dark grey column), aboveground biomass at anthesis (blank column) and maturity (blank column plus dark grey column), N productivity from sowing to anthesis and from anthesis to maturity of winter wheat over two growing seasons. Vertical bars indicate standard error. Columns as follows: blank, aboveground AGN and biomass at anthesis; black, aboveground AGN and biomass from anthesis to maturity; light grey, N productivity.

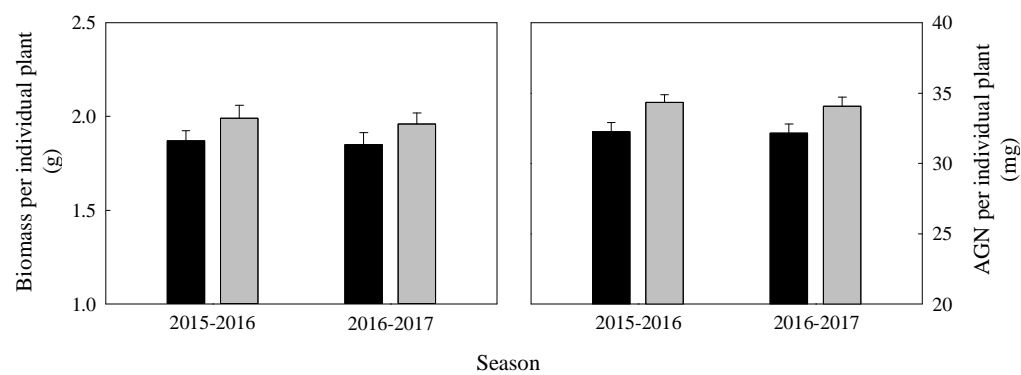

**Fig. 2.** Biomass and aboveground nitrogen uptake (AGN) per individual plant at anthesis in winter wheat over two growing seasons. Vertical bars indicate standard errors. Columns as follows: black, 8 October; dark grey, 22 October.



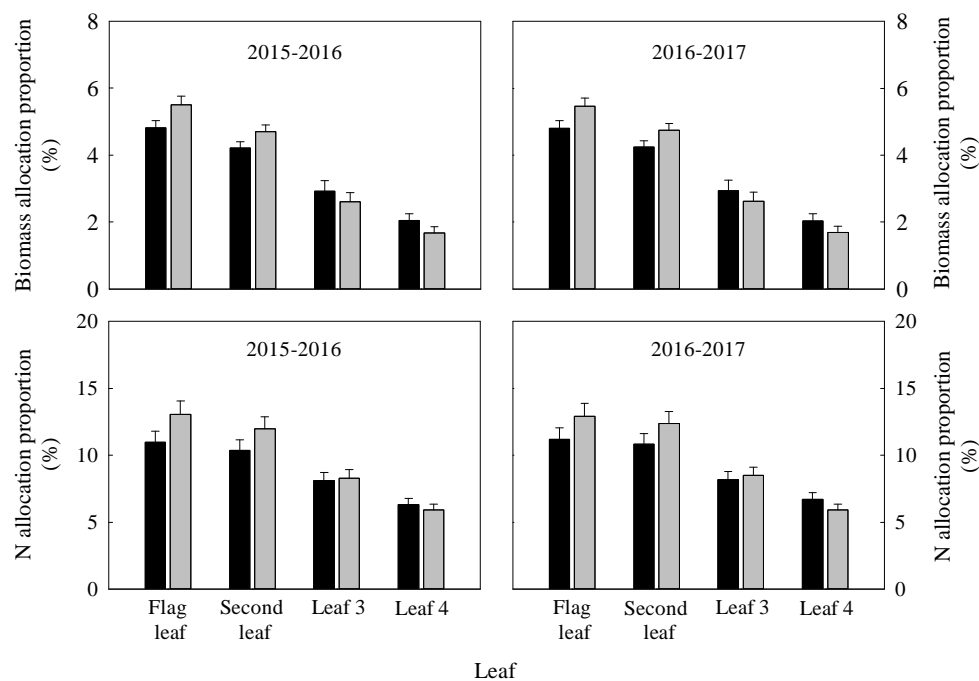

**Fig. 3.** Biomass and *N* allocation proportion to flag leaf, second leaf, leaf 3, and leaf 4 in per individual winter wheat plant at anthesis over two growing seasons. Vertical bars indicate standard error. Columns as follows: black, 8 October; dark grey, 22 October.

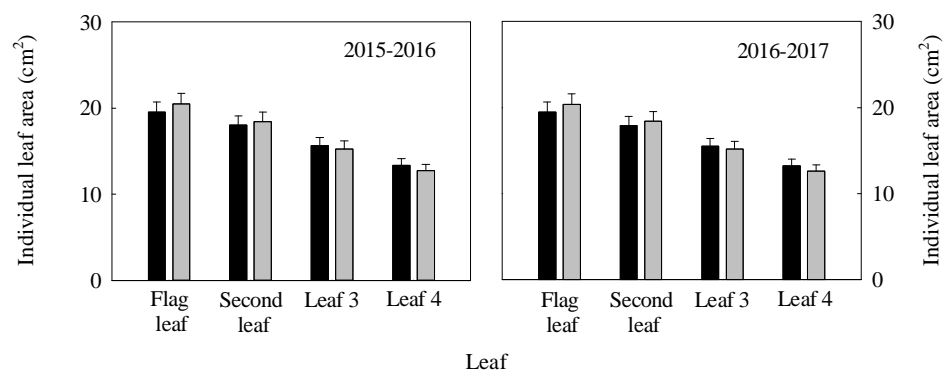

**Fig. 4.** Area per individual leaf at different positions during anthesis in winter wheat over two growing seasons. Vertical bars indicate standard error. Columns as follows: black, 8 October; dark grey, 22 October.

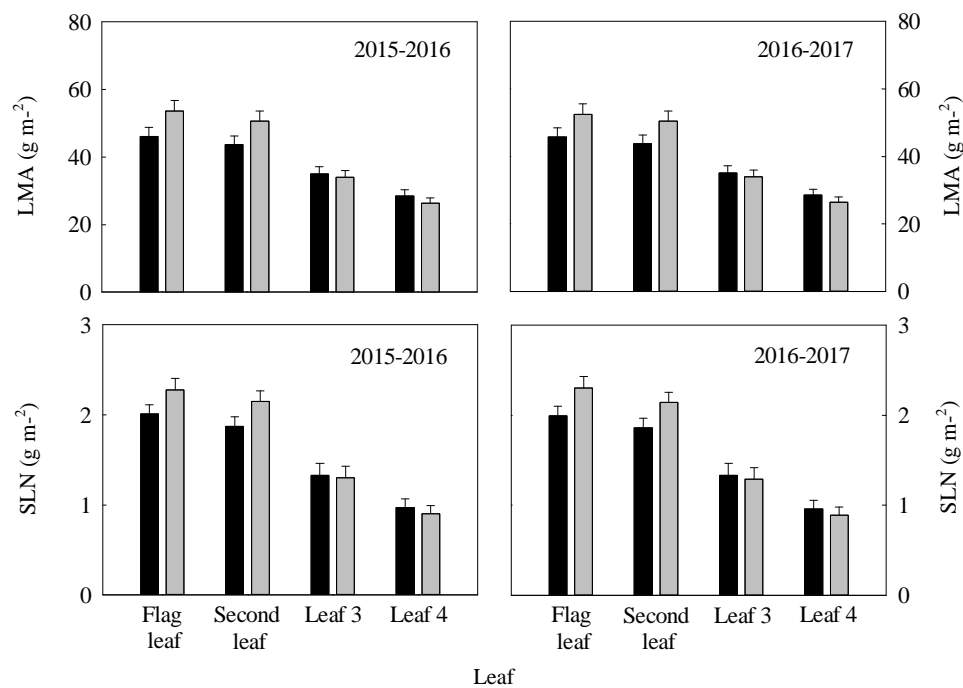

**Fig. 5.** Leaf mass per area (*LMA*) and specific leaf nitrogen content (*SLN*) of different leaf layers at anthesis in winter wheat over two growing seasons. Vertical bars indicate standard error. Columns as follows: black, 8 October; dark grey, 22 October.

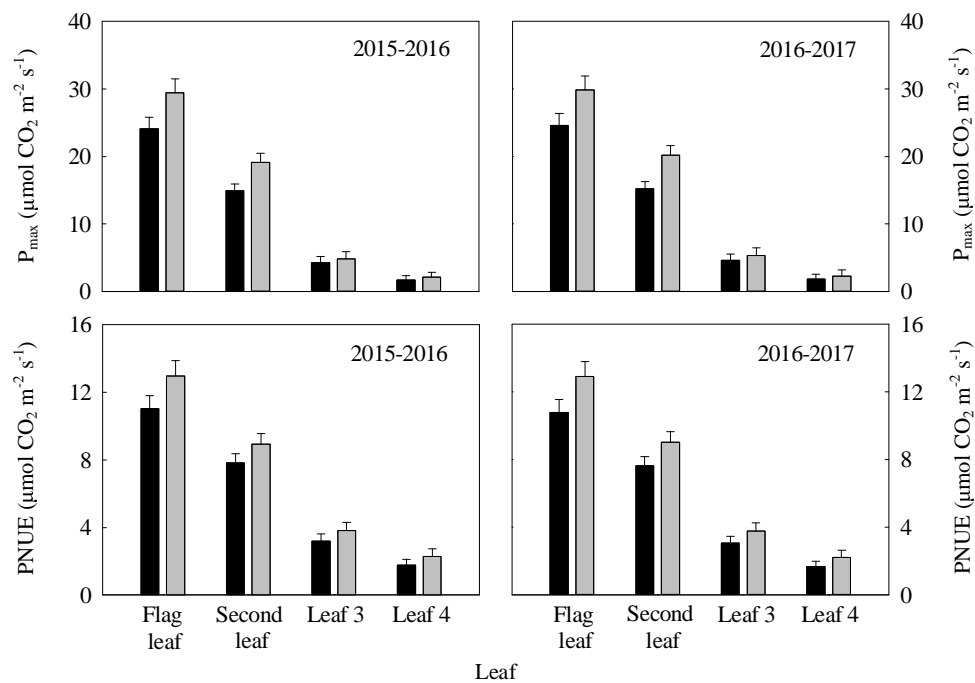

**Fig. 6.** Light-saturated net photosynthetic rate ( $P_{max}$ ) and photosynthetic nitrogen use efficiency (PNUE) of different leaf layers at anthesis in winter wheat over two growing seasons. Vertical bars indicate standard error. Columns as follows: black, 8 October; dark grey, 22 October.

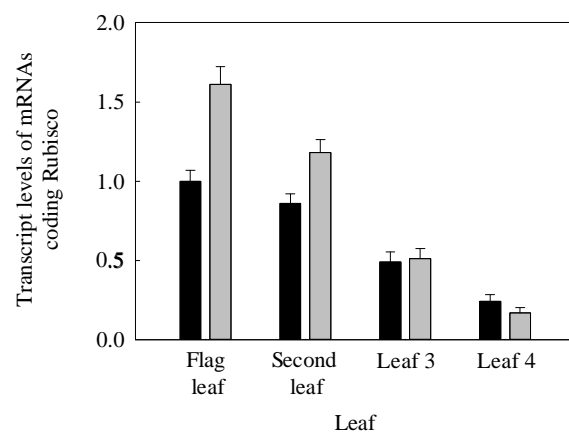

**Fig. 7.** Transcript levels of *mRNAs* coding Rubisco per unit leaf area of different leaf positions at anthesis in winter wheat during the 2016-2017 season. Vertical bars indicate standard error. Columns as follows: black, 8 October; dark grey, 22 October.

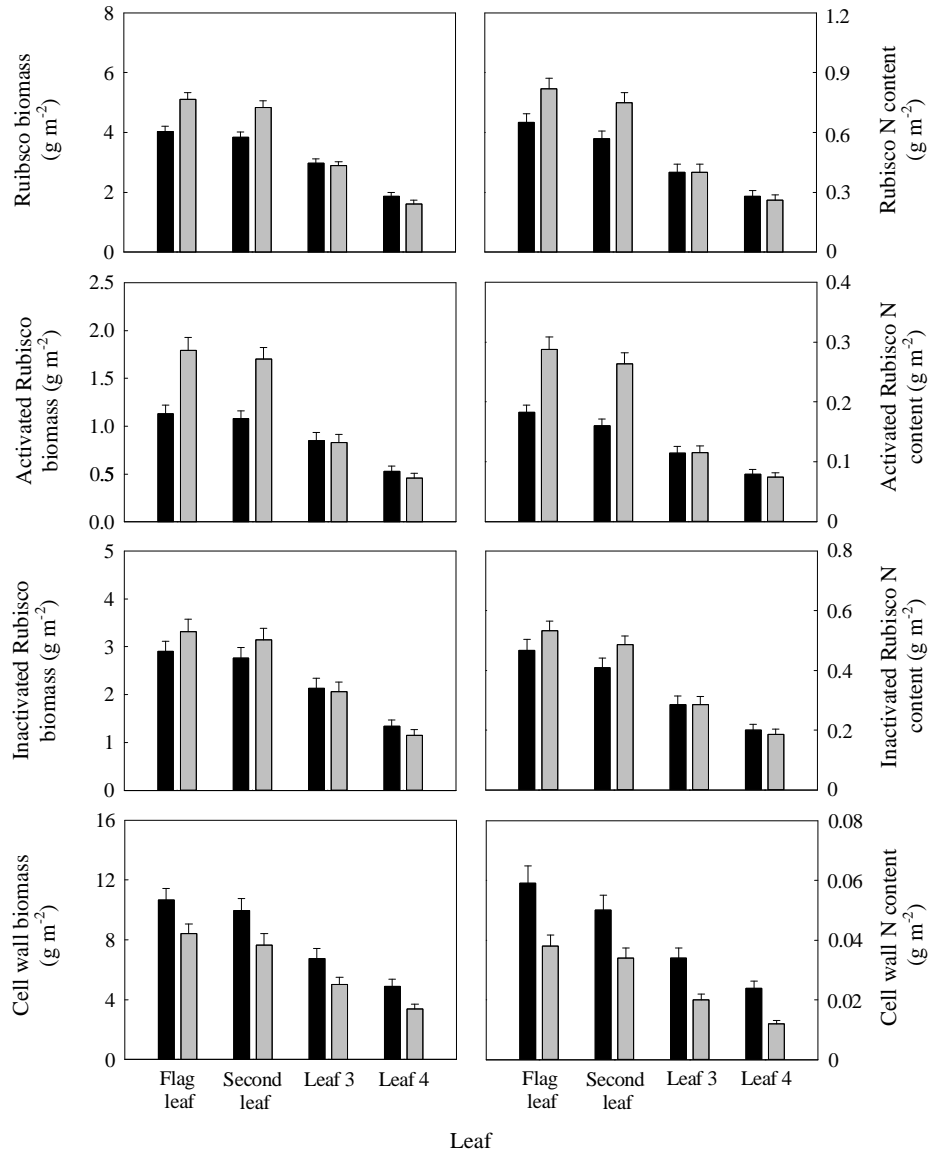

**Fig. 8.** Rubisco biomass and *N* content, cell wall biomass and *N* content, activated Rubisco biomass and *N* content, and inactivated Rubisco biomass and *N* content per unit leaf area at different leaf positions during anthesis of winter wheat in the 2016-2017 season. Vertical bars indicate standard error. Columns as follows: black, 8 October; dark grey, 22 October.

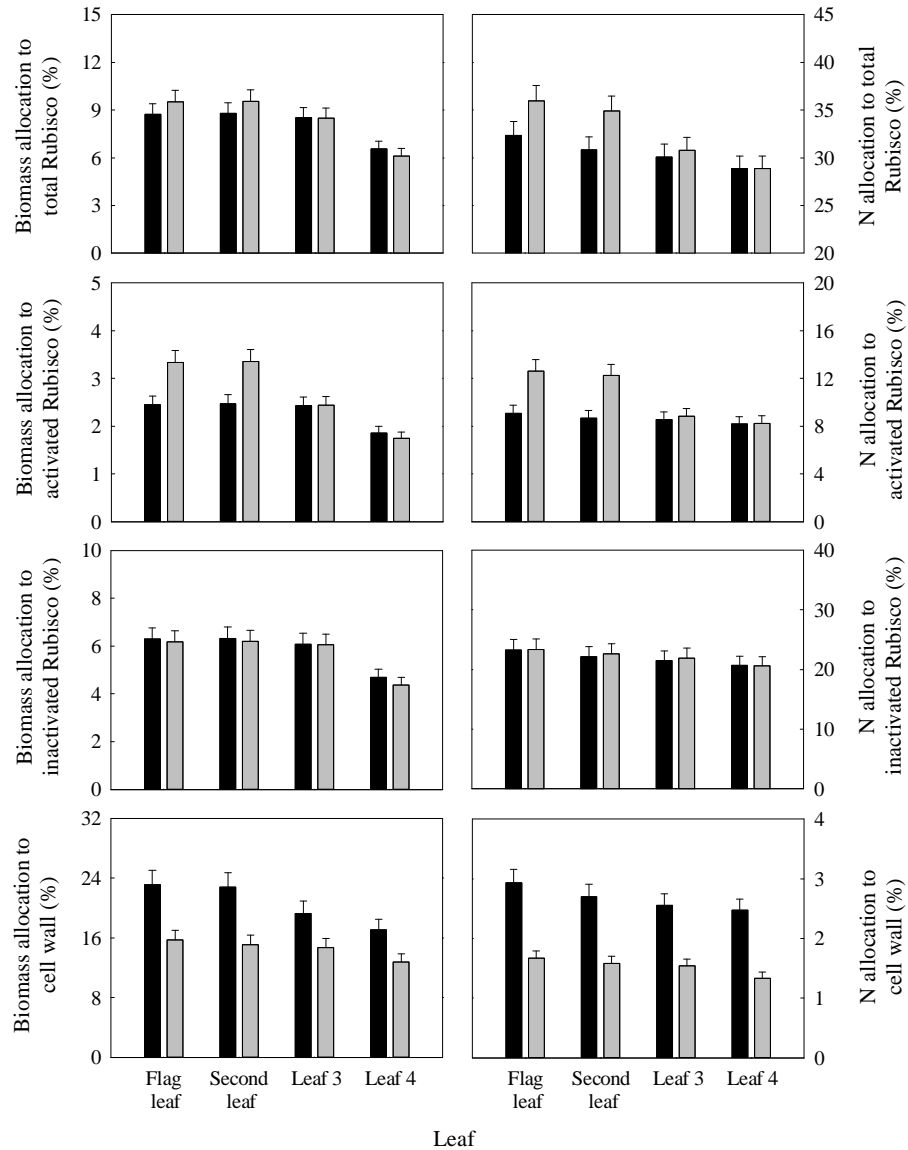

**Fig. 9.** Biomass allocation to total Rubisco, *N* allocation to total Rubisco, biomass allocation to cell wall, *N* allocation to cell wall, biomass allocation to activated Rubisco, *N* allocation to activated Rubisco, biomass allocation to inactivated Rubisco, and *N* allocation to inactivated Rubisco per unit leaf area of different leaf positions at anthesis of winter wheat during the 2016-2017 season. Vertical bars indicate standard error. Columns as follows: black, 8 October; dark grey, 22 October.

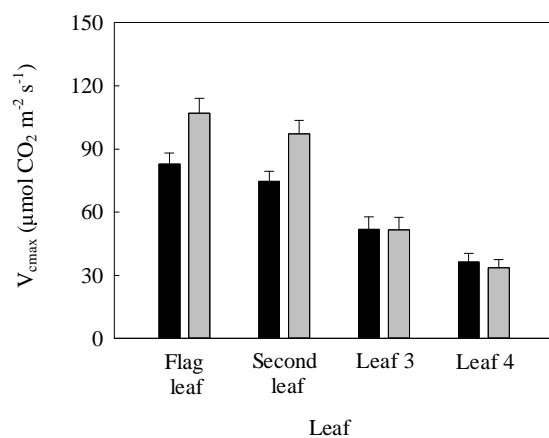

**Fig. 10.** Maximum carboxylation rate limited by Rubisco ( $V_{max}$ ) per unit leaf area at different leaf positions during anthesis of winter wheat in the 2016-2017 season. Vertical bars indicate standard error. Columns as follows: black, 8 October; dark grey, 22 October.



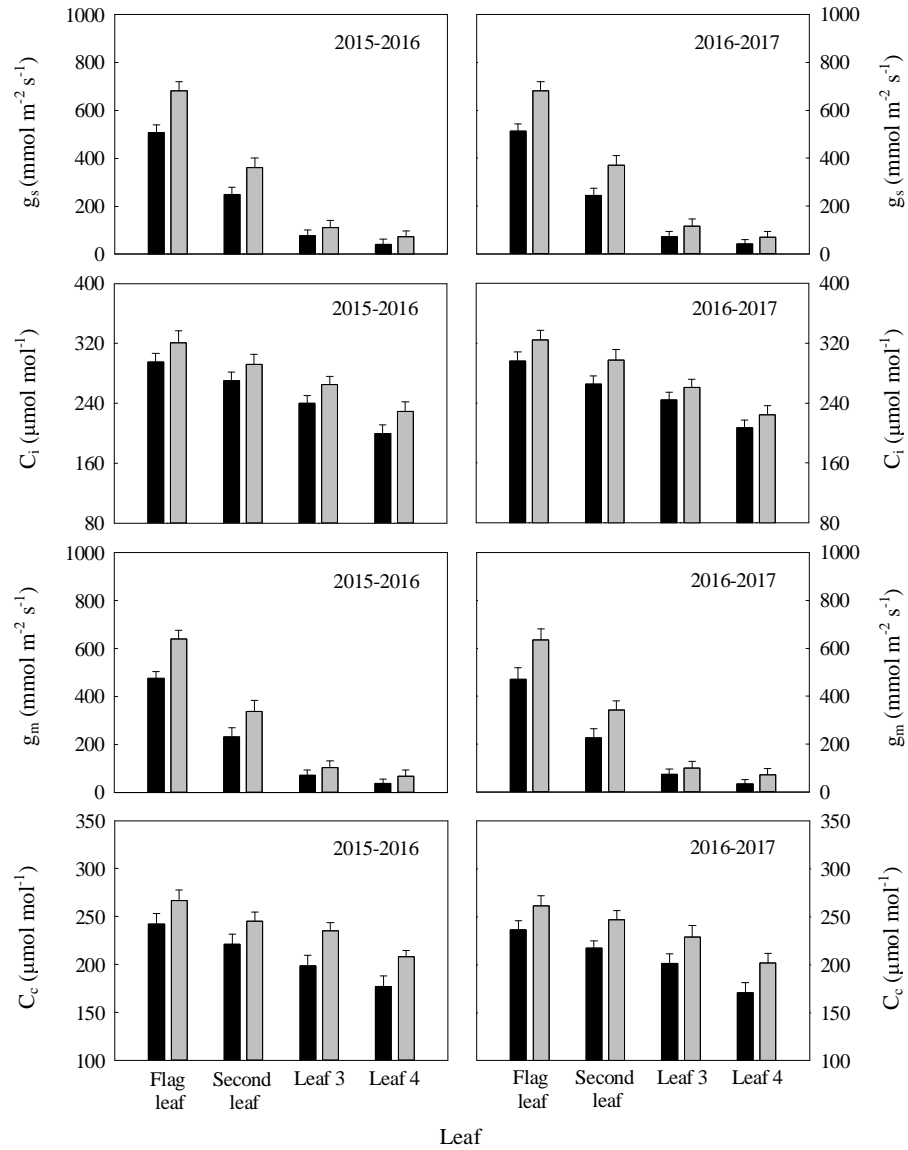

**Fig. 11.** Stomatal conductance ( $g_s$ ), intercellular  $\text{CO}_2$  concentration ( $C_i$ ), mesophyll conductance ( $g_m$ ), and chloroplast  $\text{CO}_2$  concentration ( $C_c$ ) per unit leaf area at different leaf positions during anthesis in winter wheat over two growing seasons. Vertical bars indicate standard error. Columns as follows: black, 8 October; dark grey, 22 October.

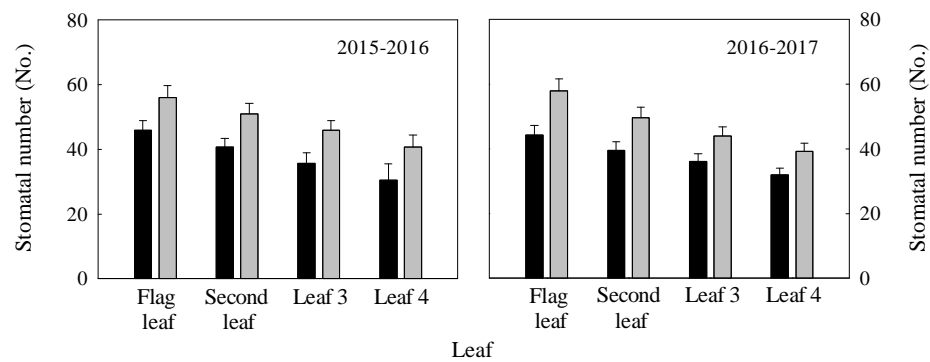

**Fig. 12.** Stomatal number per unit leaf area at different leaf positions during anthesis in winter wheat over two growing seasons. Vertical bars indicate standard error. Columns as follows: black, 8 October; dark grey, 22 October.

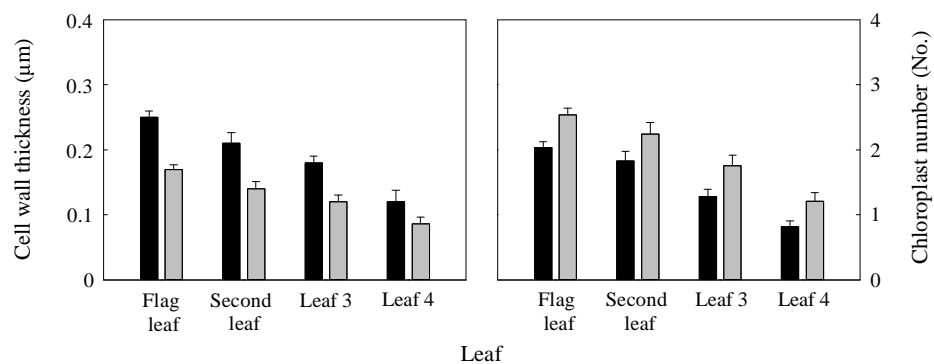

**Fig. 13.** Cell wall thickness and chloroplast number per unit leaf area at different leaf positions during anthesis of winter wheat in the 2016-2017 season. Vertical bars indicate standard error. Columns as follows: black, 8 October; dark grey, 22 October.

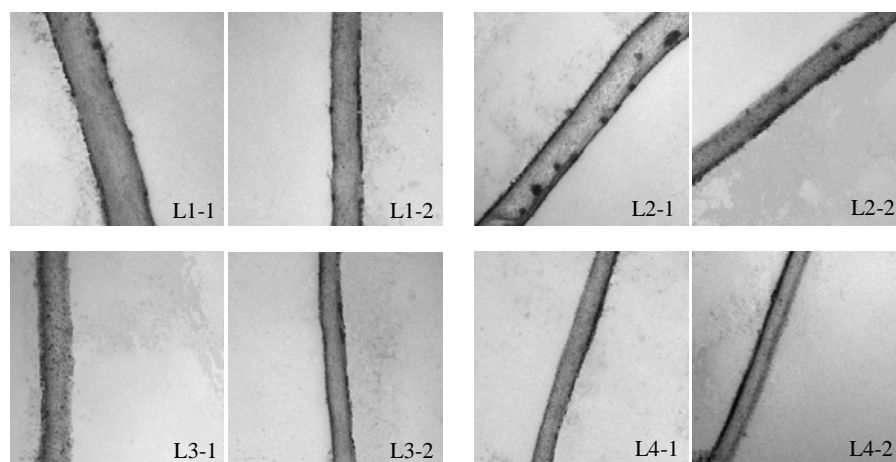

Cell wall thickness

**Fig. 14.** Estimates of cell wall thickness in winter wheat leaf (L1-1, flag leaf on 8 October; L1-2, flag leaf on 22 October; L2-1, second leaf on 8 October; L2-2, second leaf on 22 October; L3-1, leaf 3 on 8 October; L3-2, leaf 3 on 22 October; L4-1, leaf 4 on 8 October; L4-2, leaf 4 on 22 October) with normal and late sowing at anthesis by electron microscopy in the 2016-2017 season. All pictures are magnified 100,000 $\times$ .

**Table 1.** Grain yield, yield components, and nitrogen utilization efficiency (UTE) at harvest for two sowing dates over two wheat growing seasons. Values are means±standard errors of three replicates per treatment.

| Season    | Sowing date | Grain yield (kg ha <sup>-1</sup> ) | Spike number (10 <sup>4</sup> ha <sup>-1</sup> ) | Grain number per spike | Thousand grain weight (g) | UTE (kg kg <sup>-1</sup> ) |
|-----------|-------------|------------------------------------|--------------------------------------------------|------------------------|---------------------------|----------------------------|
| 2015-2016 | 8-Oct       | 9316.7±232.9a                      | 662.4±16.6a                                      | 37.2±0.93b             | 39.5±0.94a                | 31.4±0.85b                 |
|           | 22-Oct      | 9243.7±225.1a                      | 590.1±14.7b                                      | 41.8±1.1a              | 39.4±1.0a                 | 34.7±0.92a                 |
| 2016-2017 | 8-Oct       | 9432.8±243.8a                      | 670.5±16.8a                                      | 37.6±1.0b              | 39.2±1.0a                 | 32.3±0.81b                 |
|           | 22-Oct      | 9378.6±238.6a                      | 605.7±15.3b                                      | 41.6±1.2a              | 39.6±1.1a                 | 36.0±0.86a                 |

Values followed by the same letter within a column and the same season are not significantly different at  $P < 0.05$  as determined by the LSD test.
